# Supplementary material for: LIMB-Q Kids—German Translation and Cultural Adaptation
Source: MDPI journal article supplement (doi:10.3390/children9091405), 2022-09-16
Supplement: s1 [file s1]

**Table S1: Items that were changed during the TCA process**

| Scale    | Item                                                                        | Problem Forward Translation                                                                                                                                                   | Backward Translation            | Decision/Changes after Expert Panel Meeting                                                                                          | Problem Cognitive Debriefing Interviews                                                                                        | Solution after Cognitive Debriefing Interviews |
|----------|-----------------------------------------------------------------------------|-------------------------------------------------------------------------------------------------------------------------------------------------------------------------------|---------------------------------|--------------------------------------------------------------------------------------------------------------------------------------|--------------------------------------------------------------------------------------------------------------------------------|------------------------------------------------|
| Use legs | These questions ask about the leg you are seeing the doctor or nurse about. | In Germany nurses do not have the same field of work and authority as nurses in some English-speaking countries and a patient is always going to see a doctor at every visit. | no problem                      | It was decided to only translate doctor.                                                                                             | no problem, no changes                                                                                                         |                                                |
| Use legs | Are you able to:                                                            | no problem                                                                                                                                                                    | Can you:                        | The words "to be able to" and "to can" have the same meaning (= können), therefore the meaning is retained.                          | no problem, no changes                                                                                                         |                                                |
| Use legs | 5. ...sit cross legged on the floor?                                        | discussed "Schneidersitz" vs. "mit überkreuzten Beinen"                                                                                                                       | no problem                      | Decided on "Schneidersitz" as it is shorter and just as easy to understand.                                                          | two participants had not tried sitting cross-legged due to recent operation, one patient did not know the word "Schneidersitz" | noted, no change                               |
| Use legs | 10. ...walk without a limp?                                                 | no problem                                                                                                                                                                    | 10. ...walk without limping?    | original item walk without a limp has a lower reading level but a child should understand the German version.                        | no problem, no changes                                                                                                         |                                                |
| Use legs | 12. ...walk on a bumpy road?                                                | Discussion whether to find a less literal translation for "road" to take other surfaces into account                                                                          | 12. ...walk on a bumpy surface? | Translation "12. ...auf holprigem Untergrund gehen?" in order to include other surfaces.                                             | no problem, no changes                                                                                                         |                                                |
| Leg feel | 12. My leg is swollen or puffy.                                             | English original: two adjectives used to describe the phenomenon concerned<br>German translation: both adjectives describe the same feeling "geschwollen"                     | no problem                      | It was decided to only use one adjective "geschwollen" in the German version as there are no German words to explain the difference. | no problem, no changes                                                                                                         |                                                |

| Scale                   | Item                                                     | Problem Forward Translation                                                                                                     | Backward Translation                       | Decision/Changes after Expert Panel Meeting                                                                                                                                                  | Problem Cognitive Debriefing Interviews                                                                                                                                     | Solution after Cognitive Debriefing Interviews                                                                                                                                                                             |
|-------------------------|----------------------------------------------------------|---------------------------------------------------------------------------------------------------------------------------------|--------------------------------------------|----------------------------------------------------------------------------------------------------------------------------------------------------------------------------------------------|-----------------------------------------------------------------------------------------------------------------------------------------------------------------------------|----------------------------------------------------------------------------------------------------------------------------------------------------------------------------------------------------------------------------|
| Leg feel                | 14. My leg has a rash (looks red).                       | no problem                                                                                                                      | no problem                                 | no problem, no change                                                                                                                                                                        | one patient was confused as their scars were red (but not a rash)                                                                                                           | noted, no change                                                                                                                                                                                                           |
| Hip feel                | 9. My hip gets stuck (not able to move it).              | No literal German translation, the symptom of a "stuck hip/knee/ankle/foot" is not one that is typically talked about in German | 9. My hip gets blocked (I cannot move it). | Difficult to find an expression which is both accurate and easy to understand for children. Conclusion: item is made clear by the addition in brackets                                       | Four patients did not know what this meant/could not imagine the feeling/did not understand what was asked                                                                  | problem: patients reply yes but are thinking about swelling or other reasons why they cannot move their hip/knee etc. --> different meaning --> noted, if difficulties in Field Test/other languages as well, might change |
| Knee feel               | 11. My knee feels wobbly (like it is going to give out). | "wobbly" and "shaky" translate to similar words in German                                                                       | no problem                                 | In order to achieve a consistent translation throughout the different scales it was decided to translate "shaky" with "wackelig" and "wobbly" with "unsicher" (literal translation: unsafe). |                                                                                                                                                                             |                                                                                                                                                                                                                            |
| Knee feel               | 12. My knee feels weak (shaky).                          |                                                                                                                                 | no problem                                 |                                                                                                                                                                                              | no problem, no changes                                                                                                                                                      |                                                                                                                                                                                                                            |
| Ankle feel              | How does your ankle feel?                                | Three different possible translations for "ankle" (= "Fußgelenk", "Sprunggelenk", "Knöchel")                                    | no problem                                 | Consensus was to use "Sprunggelenk" as it is the anatomically correct expression and also thought to be understandable for children.                                                         | two patients did not know the word "Sprunggelenk", one of which also did not know the word "Knöchel" which had been discussed as an alternative in the expert panel meeting | noted, no changes as it is the anatomical correct translation and all other patients understood --> might have to be explained by supervising adult                                                                        |
| You feel about your leg | 5. I worry about my leg.                                 | no problem                                                                                                                      | no problem                                 | no problem, no change                                                                                                                                                                        | Two patients did not know whether "sorgen" refers to "versorgen" (to care about/take care of) or "sich Sorgen machen" (to worry about)                                      | The translation was changed to "5. Ich mache mir Sorgen um mein Bein." to avoid confusion; original meaning retained                                                                                                       |

| Scale                   | Item                                                      | Problem Forward Translation           | Backward Translation                      | Decision/Changes after Expert Panel Meeting | Problem Cognitive Debriefing Interviews                                                                                                                                            | Solution after Cognitive Debriefing Interviews                                                                                                                                                                                                   |
|-------------------------|-----------------------------------------------------------|---------------------------------------|-------------------------------------------|---------------------------------------------|------------------------------------------------------------------------------------------------------------------------------------------------------------------------------------|--------------------------------------------------------------------------------------------------------------------------------------------------------------------------------------------------------------------------------------------------|
|                         |                                                           |                                       |                                           |                                             |                                                                                                                                                                                    | (even better than previous version)                                                                                                                                                                                                              |
| You feel about your leg | 9. I avoid going out because of my leg (like to a party). | no problem                            | no problem                                | no problem, no change                       | Party does not apply for younger children, some parents/patients suggested something like "Spielplatz" (playground) or "Übernachtungsparty" (sleep over) as an alternative example | noted, no changes --> flagged: if problem occurs in field testing/other languages might change                                                                                                                                                   |
| Leg looks               | 4. ...the size of your leg?                               | 4. ...den Umfang/Größe Deines Beines? | 4. ...the circumference/size of your leg? | no change                                   | two patients did not know the word "Umfang" (circumference) and suggested to use "Dicke" (thickness) or "Breite" (wideness) instead                                                | Decision to keep the word "Umfang" as it is closer to the original meaning                                                                                                                                                                       |
| School                  | 2. My teachers help me at school.                         | no problem                            | no problem                                | no problem, no change                       | Three patients did not know whether this referred to physical help regarding their leg or academic help/assistance                                                                 | The item is asking about the requiring of physical help from the teachers. While this might not be clear to all patients most should know that the questionnaire is about their leg and therefore answer in respect to their physical abilities. |
| School                  | 12. I fit in at school.                                   | no problem                            | no problem                                | no problem, no change                       | One patient did not know the word "zugehörig" (belonging to)                                                                                                                       | noted, no changes, as all other wordings would be more difficult to understand / would not make sense                                                                                                                                            |

| Scale  | Item                                           | Problem Forward Translation                                                                                     | Backward Translation                                | Decision/Changes after Expert Panel Meeting                                                                                                                                                                | Problem Cognitive Debriefing Interviews                                                                                                                  | Solution after Cognitive Debriefing Interviews                                                                                                                                                  |
|--------|------------------------------------------------|-----------------------------------------------------------------------------------------------------------------|-----------------------------------------------------|------------------------------------------------------------------------------------------------------------------------------------------------------------------------------------------------------------|----------------------------------------------------------------------------------------------------------------------------------------------------------|-------------------------------------------------------------------------------------------------------------------------------------------------------------------------------------------------|
| School | 15. I forget about my leg when I am at school. | The German translation for "Forget about" in order to retain the meaning would be "I do not think about my leg" | 15. I don't think about my leg when I am at school. |                                                                                                                                                                                                            | Question includes negation in German (I do not think about my leg) making replying difficult "Nie" (never) and "Immer" (always) means (double negative). | Translation was changed to "15. Ich vergesse mein Bein, wenn ich in der Schule bin." (closer to English original but might sound strange to German participants) --> check during field testing |
| Feel   | 1. I am happy with my life.                    | More common in German to say "Ich bin zufrieden mit meinem Leben" which translates to "being satisfied"         | 1. I am satisfied with my life.                     | Difficulty finding word happy in German as items 1 and 3 are very close. Consensus was to keep the same word for 'happy' as used in item 3 to be consistent with the English version and German for item 3 | no problem, no changes                                                                                                                                   |                                                                                                                                                                                                 |
